# Supplementary material for: Risk of Experiencing an Overdose Event for Patients Undergoing Treatment With Medication for Opioid Use Disorder
Source: Atypon-hosted journal article supplement (doi:10.1176/appi.ajp.20220312), 2023-03-09
Supplement: appi.ajp.20220312.ds001.pdf [file appi.ajp.20220312.ds001.pdf]

**TABLE S1.** Competing risks on overdose in the Fine and Gray's subdistribution hazard model with study dropout ( $N = 583$ ) as the competing event

| <b>Variable</b>                           | <b>Hazard Ratio</b> | <b>95% CI</b> | <b>Chi-Square</b> | <b>Pr &gt; ChiSq</b> |
|-------------------------------------------|---------------------|---------------|-------------------|----------------------|
| <b>Assigned treatment (Study)</b>         |                     |               |                   |                      |
| XR Naltrexone (CTN0051) (ref)             |                     |               |                   |                      |
| BUP (CTN0027)                             | 0.24                | 0.10, 0.60    | 9.37              | 0.002                |
| MET (CTN0027)                             | 0.35                | 0.14, 0.88    | 5.01              | 0.025                |
| BUP (CTN0030)                             | 0.18                | 0.04, 0.79    | 5.17              | 0.023                |
| BUP (CTN0051)                             | 0.34                | 0.13, 0.88    | 5.00              | 0.025                |
| <b>Female</b>                             | 0.56                | 0.26, 1.21    | 2.16              | 0.141                |
| <b>Age</b>                                | 0.96                | 0.93, 1.00    | 3.53              | 0.060                |
| <b>Hispanic</b>                           | 2.03                | 0.76, 5.41    | 2.01              | 0.156                |
| <b>Race</b>                               |                     |               |                   |                      |
| White (ref)                               |                     |               |                   |                      |
| Black                                     | 2.07                | 0.69, 6.22    | 1.69              | 0.194                |
| Other                                     | 0.34                | 0.08, 1.38    | 2.27              | 0.132                |
| <b>Baseline substance use<sup>1</sup></b> |                     |               |                   |                      |
| Heroin                                    | 0.80                | 0.24, 2.64    | 0.14              | 0.708                |
| Benzodiazepine                            | 3.16                | 1.56, 6.41    | 10.19             | 0.001                |
| Prescription opioids                      | 0.56                | 0.23, 1.36    | 1.65              | 0.199                |

BUP: Buprenorphine; MET: Methadone; XR: Extended-release

<sup>1</sup>Any use in the 28 days before baseline, assessed with the timeline followback.

**TABLE S2.** Effects of assigned treatment on overdose in the proportional hazard model, controlling for sociodemographic variables, baseline substance use and time varying dose, in the subsample who initiated assigned medication treatment

| <b>Variable</b>                           | <b>Hazard Ratio</b> | <b>95% CI</b> | <b>Chi-Square</b> | <b>Pr &gt; ChiSq</b> |
|-------------------------------------------|---------------------|---------------|-------------------|----------------------|
| <b>Assigned treatment (Study)</b>         |                     |               |                   |                      |
| XR Naltrexone (CTN0051) (ref)             |                     |               |                   |                      |
| BUP (CTN0027)                             | 0.56                | 0.18, 1.72    | 1.02              | 0.312                |
| MET (CTN0027)                             | 0.64                | 0.21, 1.95    | 0.63              | 0.429                |
| BUP (CTN0030)                             | 0.41                | 0.07, 2.40    | 0.97              | 0.325                |
| BUP (CTN0051)                             | 0.44                | 0.14, 1.39    | 1.97              | 0.161                |
| <b>Female</b>                             | 0.49                | 0.20, 1.21    | 2.39              | 0.122                |
| <b>Age</b>                                | 0.96                | 0.92, 1.00    | 3.56              | 0.059                |
| <b>Hispanic</b>                           | 2.45                | 0.77, 7.85    | 2.29              | 0.130                |
| <b>Race</b>                               |                     |               |                   |                      |
| White (ref)                               |                     |               |                   |                      |
| Black                                     | 3.04                | 1.05, 8.78    | 4.22              | 0.040                |
| Other                                     | 0.13                | 0.02, 1.09    | 3.54              | 0.060                |
| <b>Baseline substance use<sup>1</sup></b> |                     |               |                   |                      |
| Heroin                                    | 0.91                | 0.22, 3.71    | 0.02              | 0.897                |
| Benzodiazepine                            | 2.62                | 1.24, 5.51    | 6.44              | 0.011                |
| Prescription opioids                      | 0.63                | 0.24, 1.64    | 0.88              | 0.349                |
| <b>Medication compliance</b>              |                     |               |                   |                      |
| Stopped <sup>2</sup>                      | 3.24                | 1.31, 8.05    | 6.43              | 0.011                |
| Stop days <sup>3</sup>                    | 0.99                | 0.98, 1.00    | 2.41              | 0.121                |

BUP: Buprenorphine; MET: Methadone; XR: Extended-release

<sup>1</sup>Any use in the 28 days before baseline, assessed with the timeline followback.

<sup>2</sup>Time-varying dummy variable of having stopped the assigned medication before the overdose event or end-of-treatment.

<sup>3</sup>Time-varying continuous variable for number of days stopping the assigned medication before the overdose event or end-of-treatment.
